# Supplementary material for: Significant Response of Methane in the Upper Troposphere to Subseasonal Variability of the Asian Monsoon Anticyclone
Source: Copernicus journal article supplement (doi:10.5194/egusphere-2024-4188), 2025-02-17
Supplement: Supplementary file 1 [file egusphere-2024-4188-supplement.pdf]

# **Supplementary Materials for “Significant Response of Methane in the Upper Troposphere to Subseasonal Variability of the Asian Monsoon Anticyclone”**

Sihong Zhu<sup>1</sup>, Mengchu Tao<sup>1,2\*</sup>, Zhaonan Cai<sup>1,3</sup>, Yi Liu<sup>1,3,4</sup>, Liang Feng<sup>5,6</sup>, Pubu Sangmu<sup>7</sup>, Zhongshui Yu<sup>8</sup>, Junji Cao<sup>9</sup>

<sup>1</sup>Carbon Neutrality Research Center, Institute of Atmospheric Physics, Chinese Academy of Sciences, Beijing 100029, China

<sup>2</sup>Key Laboratory for Middle Atmosphere and Global Environment Observation, Institute of Atmospheric Physics, Chinese Academy of Sciences, Beijing 100029, China

<sup>3</sup>Key Laboratory of Atmospheric Environment and Extreme Meteorology, Beijing 100029, China

<sup>4</sup>University of Chinese Academy of Sciences, Beijing 100049, China

<sup>5</sup>National Centre for Earth Observation, University of Edinburgh, Edinburgh, EH9 3FF, UK

<sup>6</sup>School of GeoSciences, University of Edinburgh, Edinburgh EH9 3FF, UK

<sup>7</sup>Linzhi City Meteorological Bureau/CMA Mêdog Field Observatory for Atmospheric Water Cycle, Linzhi, 860000, China

<sup>8</sup>Xizang Institute of Plateau Atmospheric and Environmental Science Research/Xizagê National Climate Observatory, Lhasa, 850001, China

<sup>9</sup>Institute of Atmospheric Physics, Chinese Academy of Sciences, Beijing 100029, China

*Correspondence to:* Mengchu Tao (mengchutao@mail.iap.ac.cn)

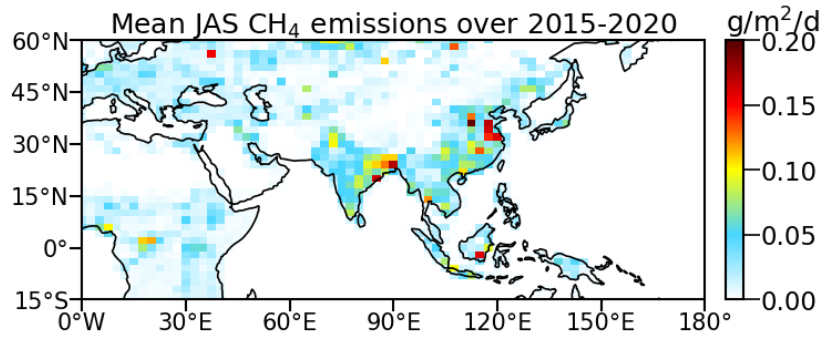

Figure S1: Map of mean CH<sub>4</sub> emissions during the JAS season (July–September) averaged over 2015–2020.

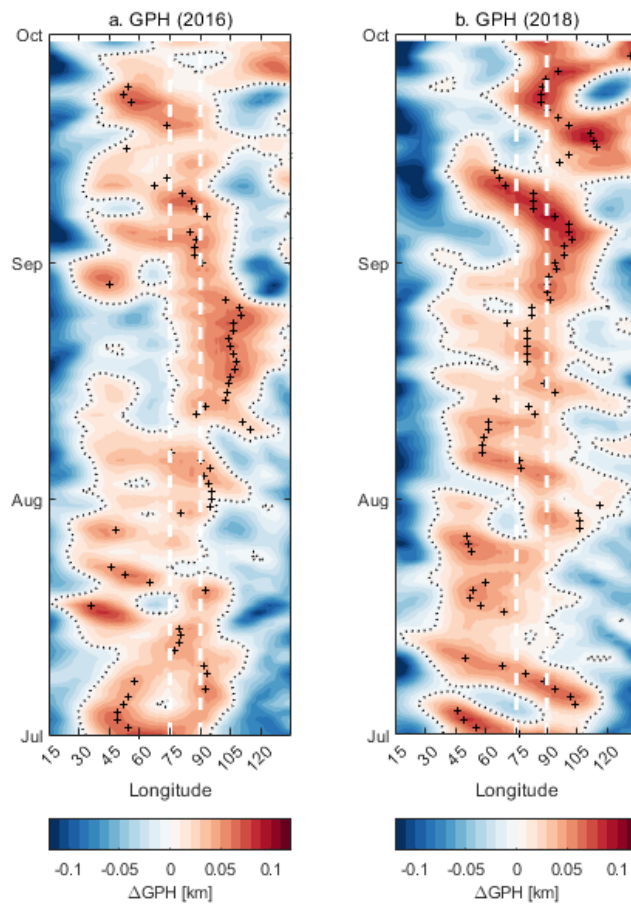

Figure S2: Hovmöller diagram of geopotential height for 2016 and 2018 JAS. The black crosses show the position of AMA center. The white dashed lines show the latitude range (75-90°E) for WTP mode.

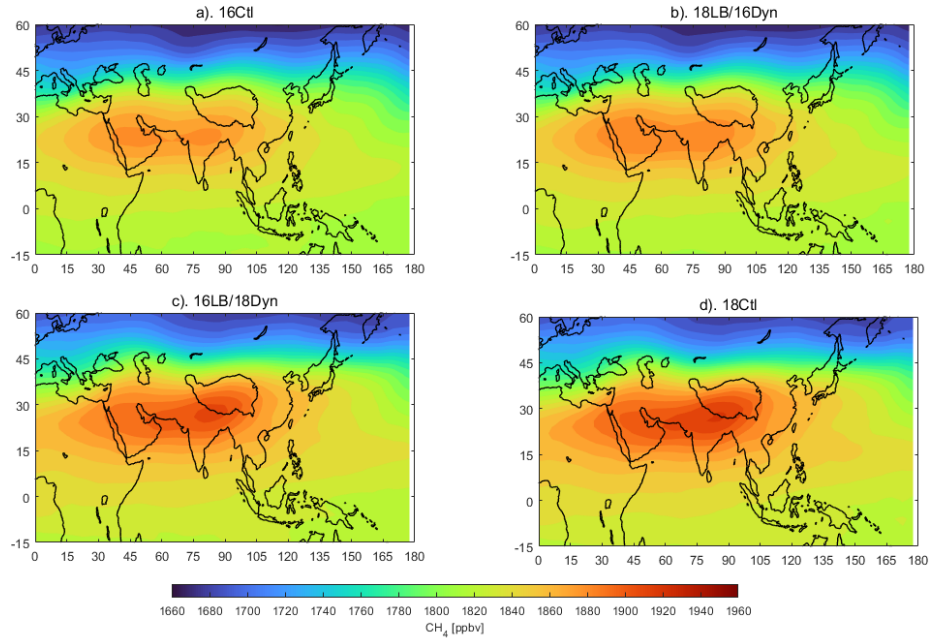

**Figure S3: The mean  $\text{CH}_4$  distribution during JAS at 100hPa based on 4 test runs for the year 2016 and 2018 listed at Table 1 (fixed L.B. runs).**

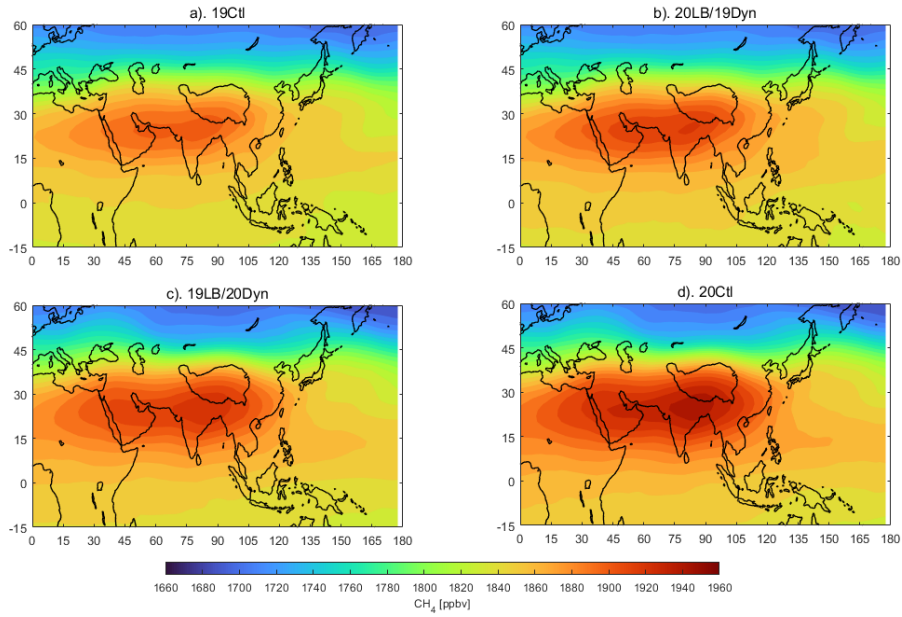

**Figure S4: The mean  $\text{CH}_4$  distribution during JAS at 100hPa based on 4 test runs for the year 2019 and 2020 listed at Table 1 (fixed Dyn. Runs).**

As we can see in Figure S3 and S4, the mean  $\text{CH}_4$  distribution at 100hPa over ASM region are not sensitive to the shift of boundary condition but more sensitive to change in the dynamical configuration. Moreover, in Figure S3, we find that difference between 16LB/18Dyn (c) and 16Ctl (a) are almost identical to the difference between 18Ctl (d) and 18LB/16Dyn (b). So are the corresponding difference shown in Figure S4.

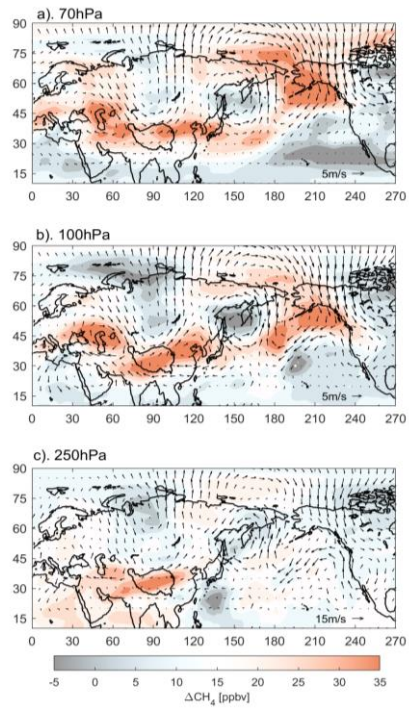

**Figure S5:** Similar as Fig. 6 (b1-3) but for larger spatial range. The arrows indicate the differences in horizontal wind between the dynamical fields of 2016 and 2018.
